# Supplementary material for: Identifying challenges to implementation of clinical practice guidelines for sentinel lymph node biopsy in patients with melanoma in Australia: protocol paper for a mixed methods study
Source: PubMed Central journal article supplement — BMJ Open. 2020 Feb 27;10(2):e032636. doi: 10.1136/bmjopen-2019-032636 (PMC7050375; doi:10.1136/bmjopen-2019-032636), 2020-02-27

## Preliminary mapping exercise: melanoma care continuum / CRE in Melanoma activities

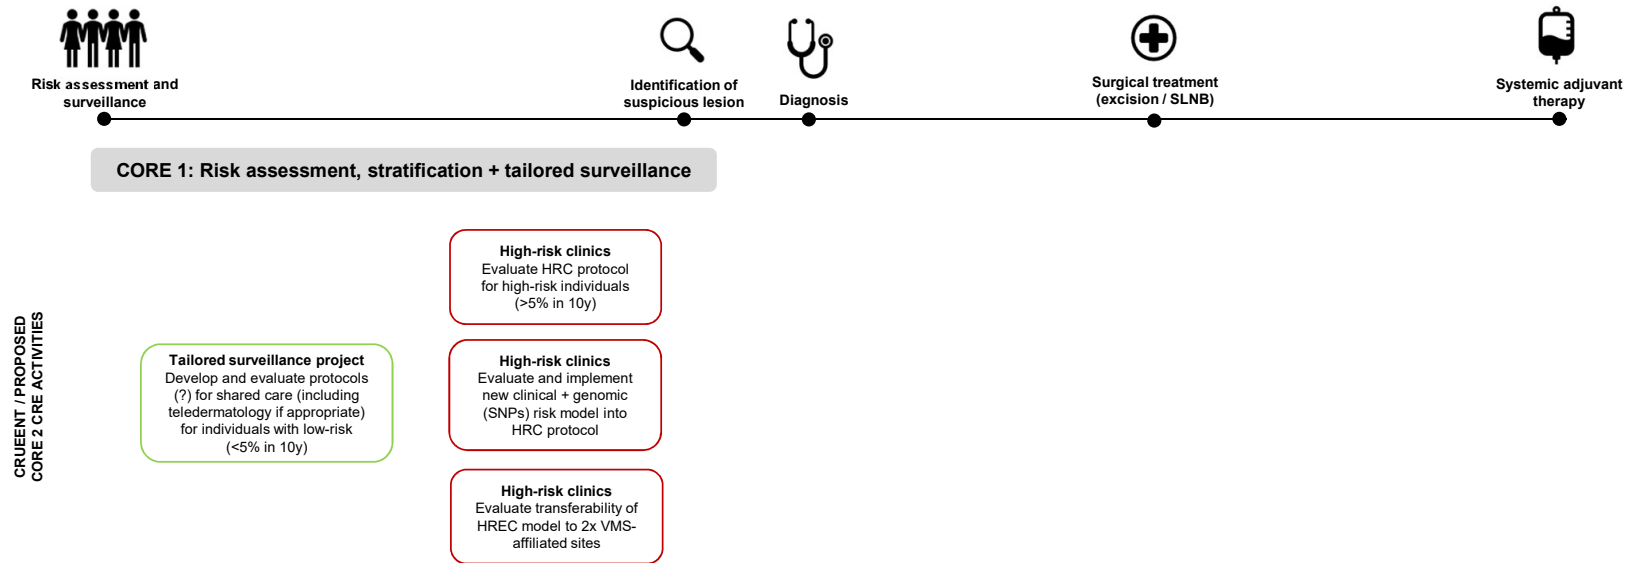

## Preliminary mapping exercise: melanoma care continuum / CRE in Melanoma activities

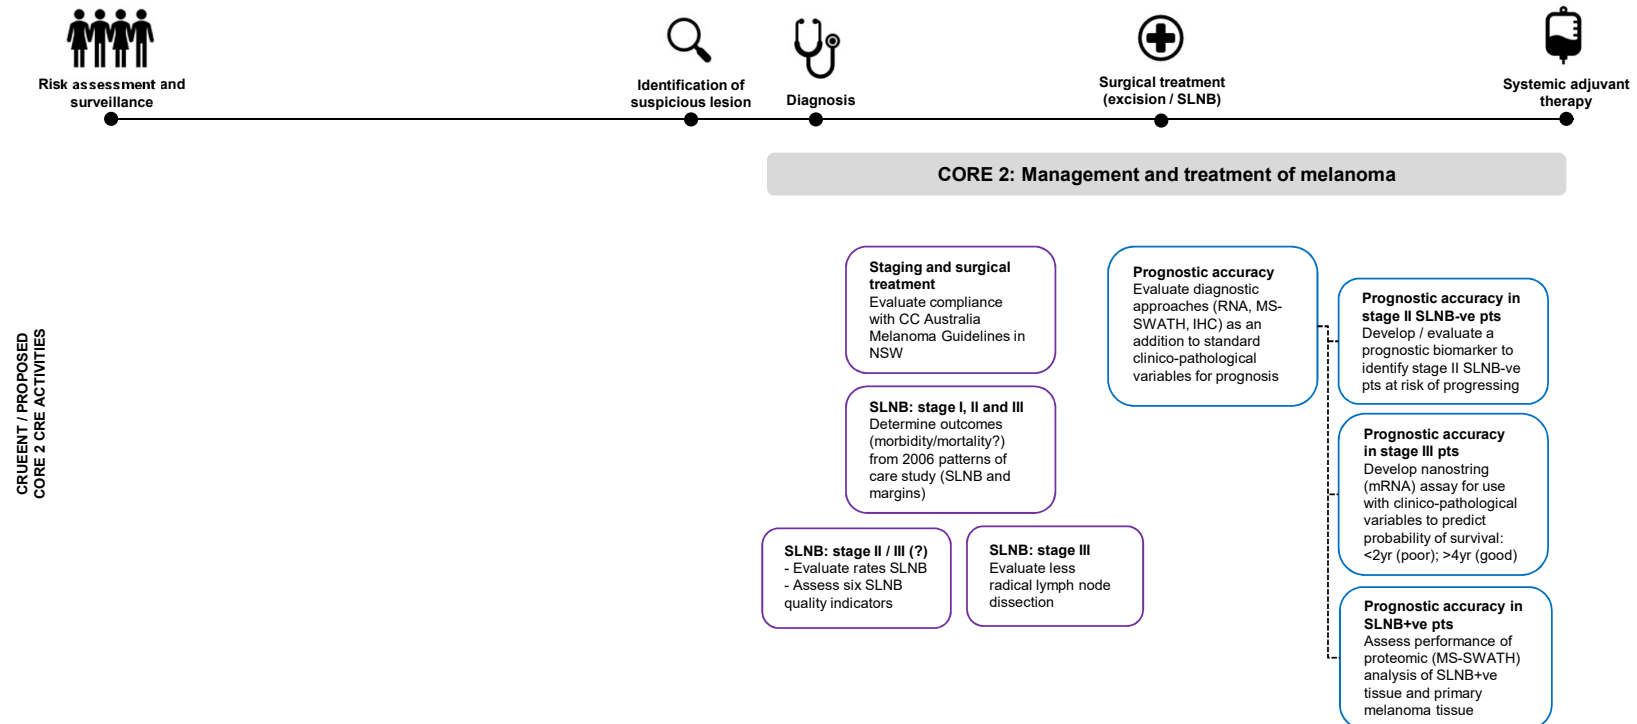

## Preliminary mapping exercise: melanoma care continuum / CRE in Melanoma activities

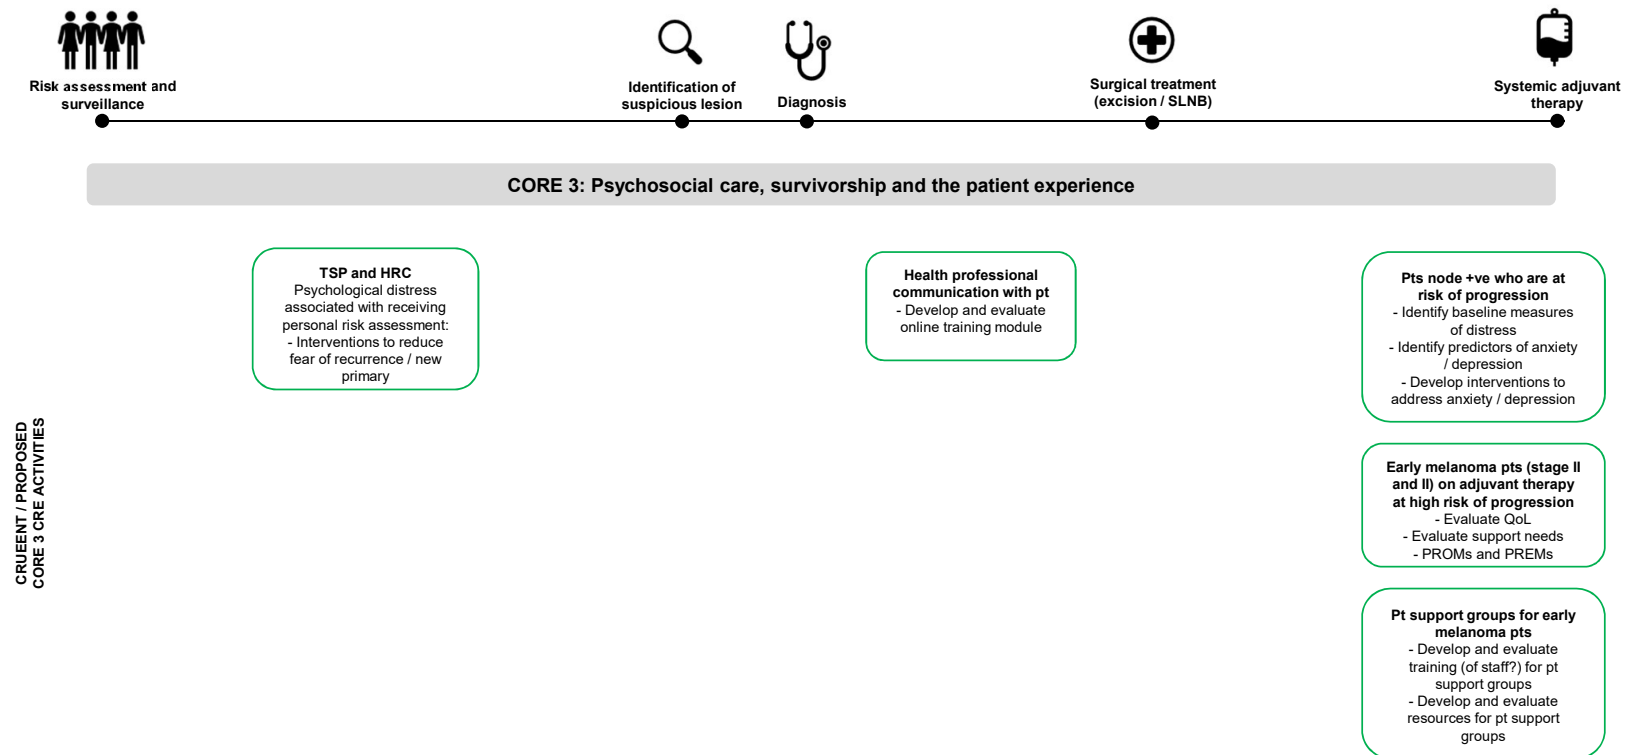

## Preliminary mapping exercise: melanoma care continuum / CRE in Melanoma activities

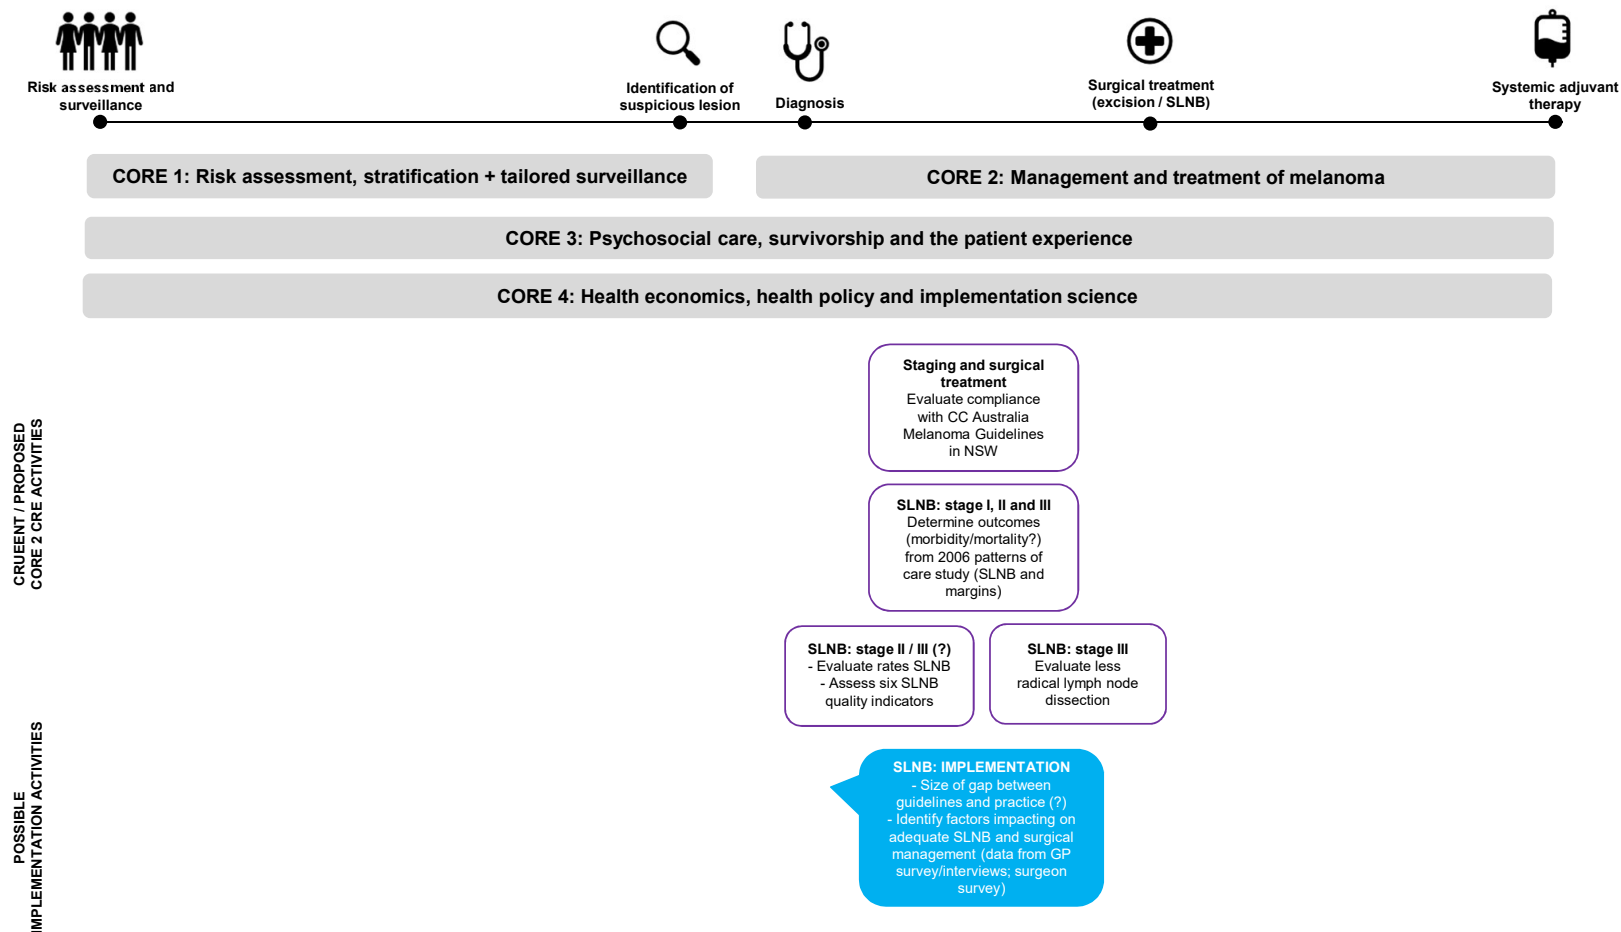

## Preliminary mapping exercise: melanoma care continuum / CRE in Melanoma activities

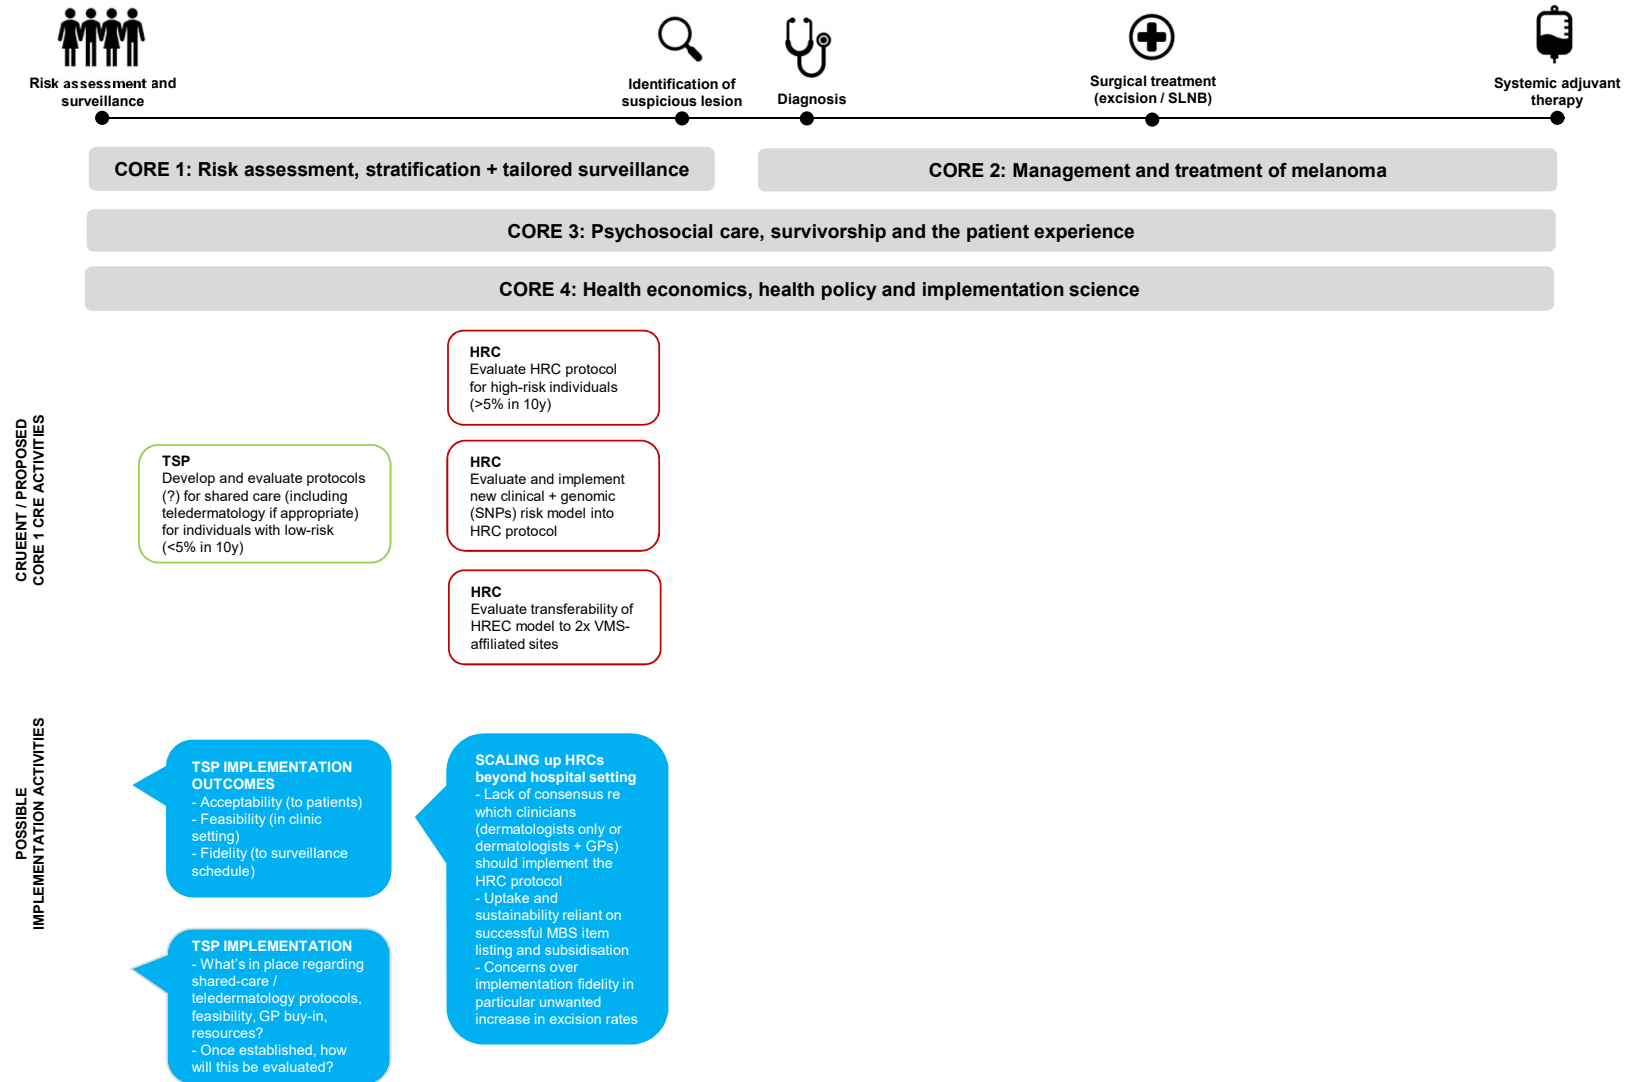

Supplement: bmjopen-2019-032636supp001.pdf [file bmjopen-2019-032636supp001.pdf]
